# Supplementary material for: Reward expectation extinction restructures and degrades CA1 spatial maps through loss of a dopaminergic reward proximity signal
Source: Nat Commun. 2022 Nov 4;13:6662. doi: 10.1038/s41467-022-34465-5 (PMC9636178; doi:10.1038/s41467-022-34465-5)
Supplement: Supplementary file 4 — Source Data [file 41467_2022_34465_MOESM4_ESM.xlsx]

## Sheet: Figure1
Figure1E						Figure1F													Figure 1G
																				Decoded vs true position (R2)
Lap	Decoded vs true position(R2)		Normalized lick frequency				Decoded vs true position (R2)					Stats										Start of track (0-50cm)		Middle of track (50-150 cm)		End of track (150-200cm)
	Mean	SEM	Mean	SEM		Animal	Rewarded	RE high	RE low	Re-Rewarded		Between	Sample size (animals)	Test type	W/T-statistic	P-value	P-value corrected				Sample Size (animals)	Mean	95% CI	Mean	95% CI	Mean	95% CI
1	0.96	0.03	1	0		1	0.98	0.96	0.58	0.78		Rewarded - RE high	12	paired t-test	3.69	0.0098	0.029			Rewarded	12	11.59	2.3	10.38	2.5	7.81	1.39
2	0.94	0.03	0.66	0.04		2	0.91	0.84	0.72	0.79		Rewarded - RE low	12	paired t-test	6.6983	0.0001	0.0002			RE Low	12	22.24	2.81	27.22	6.73	20.37	4.48
3	0.94	0.03	0.31	0.06		3	0.97	0.84	0.76	0.8		Rewarded - Rerewarded	6	Wilcoxon signed-rank test	0	0.01	0.01			ReRewarded	6	16.24	5.39	21.64	3.26	14.97	5.13
4	0.93	0.02	0.18	0.04		4	0.87	0.87	0.7	0.8		RE high - RE low	12	paired t-test	4.7095	0.0011	0.003
5	0.93	0.02	0.15	0.04		5	0.97	0.92	0.85	0.84										Stats
6	0.92	0.02	0.12	0.03		6	0.96	0.92	0.27	0.92										Between	Sample size (animals)	Test type	t-statistic	P-value
7	0.9	0.03	0.09	0.03		7	0.95	0.94	0.46										Start of track	Rewarded - RE low	12	paired t-test	-7.0139	p<0.0001
8	0.84	0.05	0.07	0.03		8	0.96	0.88	0.57											Rewarded - ReRewarded	6	paired t-test	-2.875	0.0348
9	0.78	0.05	0.07	0.03		9	0.95	0.94	0.89
10	0.74	0.05	0.06	0.03		10	0.96	0.86	0.7										Middle of Track	Rewarded - RE low	12	paired t-test	-7.1279	p<0.0001
11	0.67	0.07	0.02	0.01		11	0.92	0.94	0.62											Rewarded - ReRewarded	6	paired t-test	-9.2119	0.0003
12	0.58	0.1	0.01	0.01		12	0.98	0.9	0.69										End of Track	Rewarded - RE low	12	paired t-test	-6.4645	p<0.0001
13	0.57	0.12	0.01	0.01																Rewarded - ReRewarded	6	paired t-test	-3.2334	0.0231
14	0.58	0.12	0.01	0.01		Boxplot
15	0.57	0.11	0	0		25th Percentile	0.9425	0.8675	0.5775	0.7925
16	0.5	0.14	0.01	0		50th Percentile (Median)	0.958	0.908	0.694	0.801
17	0.66	0.09	0	0		75th Percentile	0.97	0.94	0.73	0.83
18	0.66	0.09	0.01	0.01
19	0.65	0.09	0.04	0.02
20	0.65	0.08	0.06	0.03

## Sheet: Figure2
Figure 2C							Figure 2D
Spatial Correlation (n = 3 mice)										Start of track (0-50cm)			Middle of track (50-150 cm)			End of track (150-200cm)
									Sample Size (cells)	Mean	95% CI	Sample Size (cells)	Mean	95% CI	Sample Size (cells)	Mean	95% CI
	Condition	Rewarded	Re Low	Re-Rewarded				Rewarded	133	0.88	0.02	262	0.87	0.02	207	0.86	0.02
								RE Low	133	0.5	0.08	262	0.63	0.05	207	0.48	0.06
Boxplot	25th Percentile	0.85	0.31	0.466583				ReRewarded	133	0.69	0.06	262	0.65	0.05	207	0.7	0.04
	50th Percentile (Median)	0.94	0.664775	0.780723
	75th Percentile	0.97	0.880385	0.923381				Stats
								Between	Sample size (cells)	Test type	t-statistic	P-value
Stats							Start of track	Rewarded - RE low	133	paired t-test	9.71	p<0.001
Between	Sample size (Cells)	Test type	T-statistic	P-value				Rewarded - ReRewarded	133	paired t-test	5.31	p<0.001
Rewarded-RE low	605	paired t-test	16.776	p<0.0001
Rewarded-Re-Rewarded	605	paired t-test	12.001	p<0.0001			Middle of Track	Rewarded - RE low	262	paired t-test	9.15	p<0.001
								Rewarded - ReRewarded	262	paired t-test	8.34	p<0.001
							End of Track	Rewarded - RE low	207	paired t-test	11.68	p<0.001
								Rewarded - ReRewarded	207	paired t-test	6.34	p<0.001

## Sheet: Figure3
Figure 3B												Figure 3E
												Rewarded	% placefields			Boxplot	Middle of Track	End of Track
Reliability												Animal	Middle of Track	End of Track		25th Percentile	21.9846	32.7961
Animal	Rewarded	Re low	Re-Rewarded			Boxplot		Rewarded	Re low	Re-Rewarded		1	19.8312	44.7257		50th Percentile (Median)	24.1379	36.4532
1	0.473625	0.188848	0.45237			25th Percentile		0.466921	0.214261	0.391007		2	26.8212	29.1391		75th Percentile	25.4796	40.5895
2	0.54699	0.391267	0.443072			50th Percentile (Median)		0.473625	0.239673	0.443072		3	24.1379	36.4532
3	0.460217	0.239673	0.338942			75th Percentile		0.510307	0.31547	0.447721
Out/In PF Firing Ratio
Animal	Rewarded	Re low	Re-Rewarded			Boxplot		Rewarded	Re low	Re-Rewarded		RE low	% placefields			Boxplot	Middle of Track	End of Track
1	0.078249	0.220572	0.090645			25th Percentile		0.080338	0.148803	0.107842		Animal	Middle of Track	End of Track		25th Percentile	24.6367	25.3655
2	0.130494	0.151408	0.135462			50th Percentile (Median)		0.082427	0.151408	0.125038		1	30.6452	20.2765		50th Percentile (Median)	25.4098	30.4545
3	0.082427	0.146199	0.125038			75th Percentile		0.10646	0.18599	0.13025		2	23.8636	30.4545		75th Percentile	28.0275	31.0743
												3	25.4098	31.694
PF Width
Animal	Rewarded	Re low	Re-Rewarded			Boxplot		Rewarded	Re low	Re-Rewarded		RE Rewarded	% placefields			Boxplot	Middle of Track	End of Track
1	63.5443	74.7926	57.993			25th Percentile		52.4365	58.5231	52.1285		Animal	Middle of Track	End of Track		25th Percentile	21.1168	35.2765
2	53.3498	60.4098	49.1522			50th Percentile (Median)		53.3498	60.4098	55.1049		1	19.1901	39.0845		50th Percentile (Median)	23.0435	39.0845
3	51.5232	56.6364	55.1049			75th Percentile		58.447	67.6012	56.5489		2	25.5245	31.4685		75th Percentile	24.284	40.6292
												3	23.0435	42.1739
Firing Intensity
Animal	Rewarded	Re low	Re-Rewarded			Boxplot		Rewarded	Re low	Re-Rewarded
1	0.397947	0.267031	0.327346			25th Percentile		0.321122	0.245105	0.271455
2	0.332157	0.331631	0.277719			50th Percentile (Median)		0.332157	0.267031	0.277719
3	0.310087	0.223179	0.26519			75th Percentile		0.365052	0.299331	0.302532
Sample size (Cells)	605	663	674
Figure 3C
												Figure 3C	Stats
Reliability												Reliability							Out/In PF Firing Ratio
		Start of track (0-50cm)			Middle of track (50-150 cm)			End of track (150-200cm)					Between		Test type	test statistic	P-value			Between		Test type	test statistic	P-value
	Sample Size (cells)	Mean	95% CI	Sample Size (cells)	Mean	95% CI	Sample Size (cells)	Mean	95% CI			Start of track	Rewarded - RE low		two tailed KS Test	0.557	p<0.001		Start of track	Rewarded - RE low		two tailed KS Test	0.17	0.05
Rewarded	133	0.43	0.04	262	0.55	0.03	207	0.45	0.03				Rewarded - ReRewarded		two tailed KS Test	0.117	0.374			Rewarded - ReRewarded		two tailed KS Test	0.086	0.744
RE Low	139	0.21	0.02	315	0.29	0.02	166	0.28	0.03
ReRewarded	126	0.41	0.03	280	0.48	0.03	251	0.38	0.02			Middle of Track	Rewarded - RE low		two tailed KS Test	0.46	p<0.001		Middle of Track	Rewarded - RE low		two tailed KS Test	0.34	p<0.001
													Rewarded - ReRewarded		two tailed KS Test	0.181	p<0.001			Rewarded - ReRewarded		two tailed KS Test	0.1	0.114
Out/In PF Firing Ratio												End of Track	Rewarded - RE low		two tailed KS Test	0.428	p<0.001		End of Track	Rewarded - RE low		two tailed KS Test	0.32	p<0.001
		Start of track (0-50cm)			Middle of track (50-150 cm)			End of track (150-200cm)					Rewarded - ReRewarded		two tailed KS Test	0.196	p<0.001			Rewarded - ReRewarded		two tailed KS Test	0.137	0.023
	Sample Size (cells)	Mean	95% CI	Sample Size (cells)	Mean	95% CI	Sample Size (cells)	Mean	95% CI
Rewarded	133	0.11	0.03	262	0.11	0.02	207	0.08	0.02
RE Low	139	0.15	0.03	315	0.2	0.02	166	0.15	0.03
ReRewarded	126	0.11	0.03	280	0.13	0.02	251	0.1	0.02
												PF Width							Firing Intensity
PF Width													Between		Test type	test statistic	P-value			Between		Test type	test statistic	P-value
		Start of track (0-50cm)			Middle of track (50-150 cm)			End of track (150-200cm)				Start of track	Rewarded - RE low		two tailed KS Test	0.052	0.992		Start of track	Rewarded - RE low		two tailed KS Test	0.121	0.309
	Sample Size (cells)	Mean	95% CI	Sample Size (cells)	Mean	95% CI	Sample Size (cells)	Mean	95% CI				Rewarded - ReRewarded		two tailed KS Test	0.178	0.044			Rewarded - ReRewarded		two tailed KS Test	0.087	0.727
Rewarded	133	68.49	3.81	262	66.54	2.53	207	39.28	2.61
RE Low	139	67.55	3.45	315	69.3	2.72	166	51.36	3.53			Middle of Track	Rewarded - RE low		two tailed KS Test	0.085	0.228		Middle of Track	Rewarded - RE low		two tailed KS Test	0.199	p<0.001
ReRewarded	126	60.83	3.06	280	62.79	2.71	251	41.47	2.46				Rewarded - ReRewarded		two tailed KS Test	0.092	0.176			Rewarded - ReRewarded		two tailed KS Test	0.115	0.049
Firing Intensity												End of Track	Rewarded - RE low		two tailed KS Test	0.248	p<0.001		End of Track	Rewarded - RE low		two tailed KS Test	0.117	0.142
		Start of track (0-50cm)			Middle of track (50-150 cm)			End of track (150-200cm)					Rewarded - ReRewarded		two tailed KS Test	0.074	0.521			Rewarded - ReRewarded		two tailed KS Test	0.093	0.255
	Sample Size (cells)	Mean	95% CI	Sample Size (cells)	Mean	95% CI	Sample Size (cells)	Mean	95% CI
Rewarded	133	0.3	0.04	262	0.42	0.04	207	0.3	0.03
RE Low	139	0.24	0.03	315	0.29	0.03	166	0.25	0.03
ReRewarded	126	0.29	0.03	280	0.34	0.03	251	0.25	0.02

## Sheet: Figure4
Figure 4F							Figure 4G
Spatial Correlation										Start of track (0-50cm)				Middle of track (50-150 cm)			End of track (150-200cm)
									Sample Size (cells)	Mean	95% CI	Sample Size (cells)		Mean	95% CI	Sample Size (cells)	Mean		95% CI
	Condition	Re Low	Saline	DCZ				Re low	256	0.59	0.05	419		0.61	0.04	253	0.6		0.04
								Saline	278	0.88	0.02	540		0.81	0.02	336	0.79		0.03
Boxplot	25th Percentile	0.385	0.794	0.5669				DCZ	420	0.73	0.03	716		0.68	0.02	500	0.7		0.03
	50th Percentile (Median)	0.7485	0.927	0.8316
	75th Percentile	0.925	0.974	0.936				Stats
	Sample Size (cells)	928	1139	1629				Between		Test type	test statistic	P-value
Stats							Start of track	RE low - Saline		two tailed KS Test	0.416	p<0.001
Between		Test type	test statistic	P-value				Re low - DCZ		two tailed KS Test	0.197	p<0.001
Re low - Saline		two tailed KS Test	0.3	p<0.001
Re low - DCZ		two tailed KS Test	0.122	p<0.001			Middle of Track	RE low - Saline		two tailed KS Test	0.26	p<0.001
Saline - DCZ		two tailed KS Test	0.23	p<0.001				Re low - DCZ		two tailed KS Test	0.082	p<0.001
							End of Track	RE low - Saline		two tailed KS Test	0.308	p<0.001
								Re low - DCZ		two tailed KS Test	0.158	p<0.001
Figure 4 H-J
Reliability
Animal	Rewarded	Re low		Before Saline	After Saline		Before DCZ	After DCZ		Boxplot	Rewarded	Re low			Before Saline	After Saline			Before DCZ	After DCZ
1	0.342094	0.204022		0.42	0.52		0.51	0.5		25th Percentile	0.334	0.227			0.42	0.45			0.49	0.35
2	0.559023	0.393666		0.57	0.56		0.61	0.59		50th Percentile (Median)	0.404	0.319			0.43	0.47			0.5	0.37
3	0.319396	0.367459		0.444	0.449385		0.49	0.35		75th Percentile	0.467	0.3608			0.48	0.53			0.52	0.47
4	0.335076	0.098776		0.373822	0.393556		0.36	0.32
5	0.466845	0.304988		0.48	0.4732		0.51	0.38		Paired t-test	t-statistic	P-value		Paired t-test	t-statistic	P-value		Paired t-test	t-statistic	P-value
6	0.464879	0.342068					0.49	0.36		n=6 mice	3.33	0.02		n=5 mice	-1.1154	0.27		n=6 mice	3.0312	0.04
Out/In PF Firing Ratio
Animal	Rewarded	Re low		Before Saline	After Saline		Before DCZ	After DCZ		Boxplot	Rewarded	Re low			Before Saline	After Saline			Before DCZ	After DCZ
1	0.12107	0.188735		0.104754	0.111609		0.113727	0.122438		25th Percentile	0.083	0.112			0.077	0.066			0.069979	0.113415
2	0.04343	0.053875		0.034949	0.034016		0.050725	0.0511		50th Percentile (Median)	0.093	0.155			0.092	0.092			0.087741	0.125305
3	0.084127	0.108516		0.077648	0.067002		0.07314	0.128172		75th Percentile	0.116	0.197			0.102	0.11			0.110881	0.129477
4	0.145026	0.368705		0.139235	0.139843		0.175398	0.165081
5	0.097685	0.196105		0.099183	0.109184		0.102342	0.129912		Paired t-test	t-statistic	P-value		Paired t-test	t-statistic	P-value		Paired t-test	t-statistic	P-value
6	0.084301	0.123175					0.068926	0.110408		n=6 mice	-3.06	0.03		n=5 mice	0.1677	0.32		n=6 mice	-2.6442	0.04
Figure 4K
Rewarded				RE low				Stats
Animal	Middle of Track	End of Track		Animal	Middle of Track	End of Track		Between	Sample size (animals)	Test type	Test statistic	P-values
1	28.125	27.5		1	30.0546	15.847		Rewarded - Re low	6	Two sided Wicoxon Rank sum test	0	0.03
2	21.2454	34.0659		2	22.7536	33.3333		Before Saline - After Saline	5	Two sided Wicoxon Rank sum test	5	0.63
3	27.2727	31.1688		3	28.6164	23.2704		Before DCZ - After DCZ	6	Two sided Wicoxon Rank sum test	1	0.06
4	23.8281	25		4	26.8212	19.2053
5	23.4043	37.9433		5	21.8927	29.9435
6	20.8738	29.6117		6	24.9123	24.5614
Before Saline				After Saline
Animal	Middle of Track	End of Track		Animal	Middle of Track	End of Track
1	28.4722	27.4306		1	27.9874	28.3019
2	21.8553	35.5346		2	23.9482	35.9223
3	24.7059	30.5882		3	27.0073	24.8175
4	21.9512	31.0976		4	22.1053	31.0526
5	23.6726	39.823		5	23.6311	40.634
Before DCZ				After DCZ
Animal	Middle of Track	End of Track		Animal	Middle of Track	End of Track
1	25.4688	32.8125		1	24.8663	32.3529
2	21.8586	37.4346		2	23.2233	36.2944
3	25.5869	30.5164		3	27.6527	21.865
4	20.8791	28.5714		4	25.1656	24.5033
5	23.7681	35.942		5	25.7979	24.2021
6	20.4663	39.3782		6	22.0096	33.4928

## Sheet: Figure 5
Figure 5D												Figure 5J
	Reward Normalized Mean F					Stats
		Start	Middle	End		Between	Sample Size (axons)	Test Type	P-value	P-value corrected			Normalized Slope * Max
	Axon1	0.3192	0.4671	0.7258		Reward Start-RE high Start	7	paired t-test	0.799967	1				Lap 1	Lap 2	Lap 3	Lap 4	Lap 5	Lap 6	Lap 7	Lap 8	Lap 9	Lap 10	Lap 11	Lap 12	Lap 13	Lap 14	Lap 15	Lap 16	Lap 17	Lap 18	Lap 19	Lap 20
	Axon2	0.2446	0.55	0.5978		Reward Start-RE low Start	7	paired t-test	0.163972	1			Axon 1	1.51588	0.524091	0.543344	1.42247	1.12772	0.400647	0.239962	0.992329	1.03971	1.01377	3.82016	-0.214214	0.4483	0.132329	-0.0871429	0.0401775	-0.188855	0.102102	-0.166064	-0.594292
	Axon3	0.1188	0.2262	0.7845		Reward Mid - RE high Mid	7	paired t-test	0.27487	1			Axon 2	0.582436	0.260476	1.6446	0.601438	2.69393	1.47597	0.402931	1.84081	1.08048	0.648368	3.9306	1.97576	0.398078	0.629661	0.138445	0.369472	-0.169242	0.560931	0.165013	0.468726
	Axon4	0.1841	0.3545	0.8678		Reward Mid - RE low Mid	7	paired t-test	0.0122979	0.525324			Axon 3	0.882911	0.904982	1.01223	1.65777	0.625658	0.648517	1.24538	0.844619	1.24612	0.677845	0.183883	0.636775	0.548408	0.37662	0.582815	0.160025	0.208885	0.146268	0.0181202	0.194517
	Axon5	0.298	0.3786	0.8425		Reward End - RE high Mid	7	paired t-test	0.000689134	0.0111937			Axon 4	0.724354	1.93918	0.675307	1.01039	0.778796	0.767522	0.764339	1.34011	1.59092	0.388923	0.271388	0.13907	0.0923955	0.114217	0.328477	0.130268	0.110035	-0.0142115	0.00717164	0.06272
	Axon6	0.3407	0.4568	0.531		Reward End - RE low End	7	paired t-test	0.00303133	6.4242e-05			Axon 5	0.799441	2.61797	1.05445	0.752897	0.301366	0.408227	0.404596	1.66105	0.928226	0.171149	0.129335	0.33685	0.169665	0.0780969	0.0175665	-0.0178873	0.0205325	0.00073125	0.0168639	0.00583697
	Axon7	0.6354	0.8255	0.8819									Axon 6	0.381902	1.78918	-0.104342	1.83018	0.721714	2.09066	4.91985	2.76099	0.974014	1.00371	0.150671	0.220477	0.0727978	0.438735	0.88013	0.732055	0.839538	-0.0112781	0.188926	0.00261247
													Axon 7	1.2554	0.723186	2.19942	2.52126	0.930538	1.24431	0.681489	0.810117	1.97825	1.45247	0.46504	0.412509	0.644996	0.86004	0.377441	0.387173	0.188798	1.22684	0.328318	2.1029
Mean		0.305829	0.465529	0.747329
95% CI		0.1527	0.1491	0.1172								Mean		0.877475	1.2513	1.00357	1.39948	1.02567	1.00512	1.23694	1.46429	1.26253	0.765176	1.27872	0.501033	0.339234	0.375671	0.319676	0.257326	0.144242	0.287341	0.0797642	0.320432
												SEM		0.147406	0.328767	0.284131	0.254364	0.294413	0.237176	0.626368	0.263312	0.146235	0.162332	0.671891	0.264996	0.0863649	0.111187	0.126903	0.0979931	0.130503	0.174163	0.0606357	0.320645
	RE High Normalized Mean F
	Axon1	0.5444	0.6645	0.4834									Normalized Lick frequency
	Axon2	0.256	0.4692	0.4428										Lap 1	Lap 2	Lap 3	Lap 4	Lap 5	Lap 6	Lap 7	Lap 8	Lap 9	Lap 10	Lap 11	Lap 12	Lap 13	Lap 14	Lap 15	Lap 16	Lap 17	Lap 18	Lap 19	Lap 20
	Axon3	0.0676	0.1691	0.4837									Axon 1	0.230769	0.384615	0.384615	0.230769	0.307692	0.153846	0.230769	0.230769	1	0	0	0	0	0	0	0	0	0	0	0
	Axon4	0.1873	0.2978	0.5945									Axon 2	0.0888889	1	0.266667	0.111111	0.0666667	0.111111	0.0666667	0.2	0.333333	0	0	0	0	0	0	0	0	0	0	0
	Axon5	0.2023	0.279	0.4509									Axon 3	0.44	0.28	1	0.64	0.68	0.68	0.2	0.4	0.68	0.2	0	0	0	0	0	0	0	0	0	0
	Axon6	0.3735	0.3807	0.4194									Axon 4	0.225	1	0.375	0.4	0.275	0.425	0.575	0.65	0.5	0.1	0	0	0	0	0	0	0	0	0	0
	Axon7	0.4143	0.5882	0.7144									Axon 5	0.225	1	0.375	0.4	0.275	0.425	0.575	0.65	0.5	0.1	0	0	0	0	0	0	0	0	0	0
													Axon 6	0.114286	0.171429	0.142857	0.171429	0.2	0.171429	0.2	0.285714	0.142857	0.371429	0	0	0	0	0	0	0	0	0	0
Mean		0.2922	0.406929	0.512729									Axon 7	0.0319149	0.0106383	0.0425532	0.0159574	0.0265957	0.0265957	0.0212766	0.0212766	0.0638298	0	0	0	0	0	0	0	0	0	0	0
95% CI		0.1746	0.164	0.1376
												Mean		0.193694	0.549526	0.369527	0.281324	0.261565	0.284712	0.266959	0.348251	0.460003	0.110204	0	0	0	0	0	0	0	0	0	0
												SEM		0.0505832	0.164894	0.116154	0.0803032	0.080853	0.0876049	0.0845903	0.0888265	0.121182	0.0518571	0	0	0	0	0	0	0	0	0	0
	RE low Normalized Mean F
	Axon1	0.3477	0.4758	0.4758
	Axon2	0.2476	0.3914	0.3914
	Axon3	0.0527	0.0867	0.0867
	Axon4	0.1873	0.2402	0.2402
	Axon5	0.2169	0.2607	0.2607
	Axon6	0.3277	0.3806	0.3806
	Axon7	0.444	0.5125	0.5125
Mean		0.260557	0.335414	0.335414
95% CI		0.1267	0.0974	0.138
Panel 5K
	normalized slope * max						Stats
		Rewarded	RE high	RE low			Between	Sample Size (axons)	Test Type	P-value	P-value corrected
	Axon 1	1	0.54	0.1802			Rewarded - RE high	7	paired t-test	0.0008664	0.000443977
	Axon 2	1	0.844	0.4074			Rewarded - RE low	7	paired t-test	0.000108859	3.42024e-07
	Axon 3	1	0.415	0.0056			RE high - RE low	7	paired t-test	0.00337204	0.00547948
	Axon 4	1	0.4965	0.1055
	Axon 5	1	0.347	0.0174
	Axon 6	1	0.5344	0.6146
	Axon 7	1	0.7994	0.3388
Center Median		1	0.53436	0.18019
25th percentile		1	0.4354	0.039425
75th percentile		1	0.73452	0.39024
Panel 5L
	Normalized slope * max					Stats
		Rewarded	ReRewarded			Between	Sample Size (axons)	Test Type	P-value
	Axon 1	1	1.0087			Rewarded - ReRewarded	5	paired t-test	0.690083
	Axon 2	1	1.1116
	Axon 3	1	0.1667
	Axon 4	1	3.3046
	Axon 5	1	0.5757
Center median		1	1.0087
25th percentile		1	0.47345
75th percentile		1	1.6599

## Sheet: Supplementary Figure 4
A: First non-licking lap							B: 2 consecutive non-licking laps							C: 4 consecutive non-licking laps
	Decoded vs true position (R2)							Decoded vs true position (R2)							Decoded vs true position (R2)
Animal	Rewarded	RE high	RE low	Re-Rewarded			Animal	Rewarded	RE high	RE low	Re-Rewarded			Animal	Rewarded	RE high	RE low	Re-Rewarded
1	0.906473	0.835705	0.71834	0.771255			1	0.98	0.96	0.58	0.78			1	0.906473	0.835705	0.712886	0.776292
2	0.975845	0.957249	0.583135	0.780041			2	0.91	0.84	0.72	0.79			2	0.975845	0.957249	0.587833	0.780041
3	0.966847	0.855386	0.769017	0.800286			3	0.97	0.84	0.76	0.8			3	0.966847	0.843942	0.759643	0.800286
4	0.865354	0.867605	0.698335	0.80187			4	0.87	0.87	0.7	0.8			4	0.865354	0.867605	0.698335	0.801923
5	0.974913	0.941248	0.835601	0.836072			5	0.97	0.92	0.85	0.84			5	0.974913	0.918322	0.835601	0.836072
6	0.964503	0.928036	0.274662	0.92219			6	0.96	0.92	0.27	0.92			6	0.964503	0.851275	0.256955	0.920531
7	0.945528	0.936874	0.463689				7	0.95	0.94	0.46				7	0.945528	0.932752	0.463689
8	0.955056	0.932402	0.785487				8	0.96	0.88	0.57				8	0.955056	0.884396	0.568013
9	0.950735	0.943217	0.888655				9	0.95	0.94	0.89				9	0.950735	0.943217	0.869798
10	0.961892	0.858816	0.701624				10	0.96	0.86	0.7				10	0.961892	0.858816	0.701624
11	0.92468	0.936389	0.615631				11	0.92	0.94	0.62				11	0.92468	0.936389	0.615631
12	0.976641	0.898628	0.692659				12	0.98	0.9	0.69				12	0.976641	0.898628	0.689372
Stats							Stats							Stats
Between	Sample size (animals)	Test type	W/T-statistic	P-value	P-value corrected		Between	Sample size (animals)	Test type	W/T-statistic	P-value	P-value corrected		Between	Sample size (animals)	Test type	W/T-statistic	P-value	P-value corrected
Rewarded - RE high	12	paired t-test	3.2397	0.01	0.03		Rewarded - RE high	12	paired t-test	3.69	0.0098	0.029		Rewarded - RE high	12	paired t-test	3.7913	0.0043	0.02
Rewarded - RE low	12	paired t-test	6.179	0.002	0.006		Rewarded - RE low	12	paired t-test	6.6983	0.0001	0.0002		Rewarded - RE low	12	paired t-test	6.77	0.001	0.0003
Rewarded - Rerewarded	6	Wilcoxon signed-rank test	0	0.01	0.01		Rewarded - Rerewarded	6	Wilcoxon signed-rank test	0	0.01	0.01		Rewarded - Rerewarded	6	Wilcoxon signed-rank test	0	0.01	0.01
RE high - RE low	12	paired t-test	4.557	0.001	0.006		RE high - RE low	12	paired t-test	4.7095	0.0011	0.003		RE high - RE low	12	paired t-test	4.84	0.0009	0.003
D: 6 consecutive non-licking laps							E: Any licking laps
	Decoded vs true position (R2)							Decoded vs true position (R2)
Animal	Rewarded	RE high	RE low	Re-Rewarded			Animal	Rewarded	RE high	RE low	Re-Rewarded
1	0.906473	0.835705	0.715118	0.771255			1	0.966847	0.853502	0.770282	0.794907
2	0.975845	0.957249	0.583135	0.780789			2	0.975845	0.939633	0.587833	0.800004
3	0.865354	0.867605	0.698335	0.80187			3	0.865354	0.877196	0.715679	0.801797
4	0.966847	0.843942	0.759643	0.802213			4	0.906473	0.809312	0.708072	0.8272
5	0.974913	0.918322	0.854714	0.836394			5	0.974913	0.947507	0.852223	0.836394
6	0.964503	0.771042	0.205093	0.920745			6	0.964503	0.869148	0.43501	0.920161
7	0.945528	0.936874	0.463689				7	0.945528	0.919579	0.438833
8	0.955056	0.882384	0.265491				8	0.955056	0.932402	0.699294
9	0.950735	0.943217	0.850942				9	0.950735	0.959509	0.87731
10	0.961892	0.858816	0.7098				10	0.961892	0.75533	0.725702
11	0.92468	0.778392	0.479008				11	0.92468	0.936389	0.615631
12	0.976641	0.898628	0.689964				12	0.976641	0.899884	0.739001
Stats							Stats
Between	Sample size (animals)	Test type	W/T-statistic	P-value	P-value corrected		Between	Sample size (animals)	Test type	W/T-statistic	P-value	P-value corrected
Rewarded - RE high	12	paired t-test	4.5284	0.001	0.003		Rewarded - RE high	12	paired t-test	2.9791	0.006	0.02
Rewarded - RE low	12	paired t-test	5.2937	0.0004	0.001		Rewarded - RE low	12	paired t-test	6.4457	p<0.0001	0.0006
Rewarded - Rerewarded	6	Wilcoxon signed-rank test	0	0.01	0.01		Rewarded - Rerewarded	6	Wilcoxon signed-rank test	0	0.01	0.01
RE high - RE low	12	paired t-test	4.4609	0.0012	0.004		RE high - RE low	12	paired t-test	4.8424	0.0005	0.002

## Sheet: Supplementary Figure 5
C: Speed matched boxplot
	Decoded vs true position (R2)
Animal	Rewarded	UR: Matched speed	UR: Slower Speed
1	0.939589	0.551963	0.197209
2	0.960953	0.808688	0.771383
3	0.931262	0.438833	0.669043
4	0.907341	0.698615	0.717948
5	0.85721	0.784865	0.698335
6	0.935326	0.785487	0.767051
7	0.951749	0.950455	0.773827
8	0.959848	0.683793	0.748504
9	0.909429	0.737009	0.422459
10	0.936451	0.704756	0.75286
11	0.972047	0.908428	0.695529
12	0.974858	0.909267	0.49562
Stats
Between	Sample size (animals)	Test type	W-statistic	P-value	P-value corrected
Rewarded - Matched speed	12	Wilcoxon signed-rank test	0	0.005	0.01
Rewarded - Slower speed	12	Wilcoxon signed-rank test	0	0.005	0.01
Matched speed - slower speed	12	Wilcoxon signed-rank test	20	0.15	0.3

## Sheet: Supplementary Figure 6
B : slowing down boxplot							F: Arousal Boxplot
	Decoded vs true position (R2)							Decoded vs true position (R2)
Animal	Rewarded	RE high Engaged	RE low Engaged	RE low Disengaged			Animal	Rewarded	RE high Engaged	RE low Engaged	RE low Disengaged
1	0.92213	0.926848	0.319312	0.195298			1	0.924	0.769	0.671	0.102
2	0.959354	0.857733	0.763711	-0.109454			2	0.771	0.643	0.318	0.392
3	0.933079	0.932752	0.87665	-0.130339			3	0.8101	0.8	0.447	0.132
4	0.897389	0.743116	0.736581	0.680123			4	0.989	0.874	0.482	0.636
5	0.845875	0.869038	0.707007	0.0134815			5	0.993	0.907	0.546	0.495
6	0.936032	0.912525	0.416752	-0.319273			6	0.983	0.9611	0.9403	0.846
7	0.903206	0.952275	0.888655	0.120331			Between	Sample size (animals)	Test type	W-statistic	P-value	P-value corrected
8	0.966518	0.790882	0.696992	0.734778			Rewarded - RE High Engaged	6	paired t-test	3.98	0.0163	0.0978
9	0.902624	0.867206	0.0872823	0.648232			Rewarded - RE low Engaged	6	paired t-test	9.1126	0.0008	0.03
10	0.921229	0.81858	0.828201	0.453915			Rewarded - RE low DisEngaged	6	paired t-test	6.087	0.0037	0.0321
11	0.973484	0.918322	0.855704	0.854714			RE High Engaged - RE Low Engaged	6	paired t-test	4.0207	0.01	0.06
12	0.970707	0.958471	0.656648	0.526599			RE High Engaged - RE Low Disngaged	6	paired t-test	4.7052	0.0093	0.0556
							RE Low Engaged - RE Low Disengaged	6	paired t-test	1.061	0.08	0.2752
Stats
Between	Sample size (animals)	Test type	W-statistic	P-value	P-value corrected
Rewarded - RE High Engaged	12	Wilcoxon signed-rank test	13	0.0425	0.25
Rewarded - RE low Engaged	12	Wilcoxon signed-rank test	0	0.0005	0.003
Rewarded - RE low DisEngaged	12	Wilcoxon signed-rank test	0	0.0005	0.003
RE High Engaged - RE Low Engaged	12	Wilcoxon signed-rank test	2	0.0015	0.008
RE High Engaged - RE Low Disngaged	12	Wilcoxon signed-rank test	0	0.0005	0.003
RE Low Engaged - RE Low Disengaged	12	Wilcoxon signed-rank test	9	0.016	0.094

## Sheet: Supplementary Figure 7
A: Example Animal 1							B: Example Animal 2
	Condition	Rewarded	Re High Engaged	Re Low Engaged	Re low Disengaged			Condition	Rewarded	Re High Engaged	Re Low Engaged	Re low Disengaged
Boxplot	25th Percentile	0.880808	0.901137	0.1906	0.025115		Boxplot	25th Percentile	0.969243	0.940507	0.569594	0.239304
	50th Percentile (Median)	0.967196	0.926848	0.319312	0.195298			50th Percentile (Median)	0.974985	0.958471	0.656648	0.526599
	75th Percentile	0.973396	0.945558	0.603318	0.351149			75th Percentile	0.98133	0.974603	0.911992	0.908379
	Sample Size (laps)	19	9	31	20			Sample Size (laps)	20	6	13	12
C: Example Animal 2
	Condition	Rewarded	Re High Engaged	Re Low Engaged	Re low Disengaged
Boxplot	25th Percentile	0.891672	0.761057	0.670494	0.546063
	50th Percentile (Median)	0.935112	0.835844	0.759016	0.637674
	75th Percentile	0.965223	0.893982	0.830786	0.702313
	Sample Size (laps)	20	6	21	8

## Sheet: Supplementary Figure 8 
Panel A									Panel B								Panel C
Pupil Area Correlation	Mean eye Movement		Stats						Pupil Area Correlation	Mean Velocity		Stats					Pupil Area Correlation	Blinking Ratio		Stats
0.430952	1.3754			Fit linear equation	Line R2	p value			0.430952	0.5267			Fit linear equation	Line R2	p value		0.430952	0			Fit linear equation	Line R2	p value
0.632776	1.5291			y = 0.3202x + 1.5676	0.0208293	0.288586			0.632776	0.9918			y = 0.1449x + 0.7606	0.071705	0.0460132		0.632776	0			y = 0.0162x + 0.0129	0.0123899	0.414087
0.762849	0.8396								0.762849	0.8687							0.762849	0
0.608452	0.8775								0.608452	0.8939							0.608452	0
0.386351	0.7804								0.386351	0.9908							0.386351	0.0658
0.768214	1.979								0.768214	0.8486							0.768214	0
0.269732	0.9738								0.269732	0.95							0.269732	0.0677
0.451423	2.2919								0.451423	0.783							0.451423	0.0619
0.452783	2.6658								0.452783	0.9341							0.452783	0.043
0.782587	1.497								0.782587	0.9715							0.782587	0
0.104513	1.2351								0.104513	0.9077							0.104513	0.0037
0.73996	1.2361								0.73996	0.8484							0.73996	0.0333
0.357365	1.4166								0.357365	0.6737							0.357365	0.0055
0.713604	1.3044								0.713604	0.9952							0.713604	0.0531
0.489518	2.5085								0.489518	0.7121							0.489518	0.017
0.512479	2.3461								0.512479	0.6741							0.512479	0.0363
0.120276	3.3105								0.120276	0.7486							0.120276	0
0.887162	2.0551								0.887162	0.7873							0.887162	0.0248
0.959307	1.9428								0.959307	0.8736							0.959307	0
0.73851	2.0891								0.73851	0.5889							0.73851	0.1099
0.842154	1.5813								0.842154	0.7559							0.842154	0.1675
0.956199	1.9571								0.956199	0.9311							0.956199	0
0.938109	2.3397								0.938109	1							0.938109	0.0519
0.89112	1.4304								0.89112	0.9491							0.89112	0
0.908739	2.0466								0.908739	0.8115							0.908739	0
0.534926	2.1167								0.534926	0.5574							0.534926	0.019
0.926245	2.2909								0.926245	0.6046							0.926245	0.0833
0.300683	1.4874								0.300683	1							0.300683	0
0.0652044	1.0947								0.0652044	0.7328							0.0652044	0
0.630272	1.5615								0.630272	0.8545							0.630272	0
0.580764	1.5515								0.580764	0.8254							0.580764	0
0.623454	1.7215								0.623454	0.8996							0.623454	0
0.418133	1.9187								0.418133	0.8231							0.418133	0
0.212536	1.7667								0.212536	0.8844							0.212536	0
0.0387517	2.0507								0.0387517	0.6719							0.0387517	0.1963
0.705858	3.1146								0.705858	0.8116							0.705858	0
0.508387	2.4963								0.508387	0.4369							0.508387	0
0.596357	2.1335								0.596357	0.6337							0.596357	0
0.288907	1.2907								0.288907	0.8217							0.288907	0
0.616218	1.4406								0.616218	0.8323							0.616218	0
0.548207	1.832								0.548207	0.8322							0.548207	0
0.714568	1.614								0.714568	0.8245							0.714568	0.0398
0.508352	2.0184								0.508352	0.7653							0.508352	0
0.546151	1.9758								0.546151	0.6466							0.546151	0
0.296387	1.1538								0.296387	0.6613							0.296387	0
-0.0334266	1.3979								-0.0334266	0.4995							-0.0334266	0
0.163321	1.0646								0.163321	0.854							0.163321	0
0.229266	0.6282								0.229266	0.8184							0.229266	0
0.168491	1.1569								0.168491	0.744							0.168491	0
0.542871	0.6736								0.542871	0.8102							0.542871	0
0.742745	0.9175								0.742745	0.7936							0.742745	0
0.229556	3.4079								0.229556	0.4237							0.229556	0
0.496769	2.8805								0.496769	0.4116							0.496769	0
0.170004	1.7833								0.170004	1							0.170004	0
-0.367126	1.1452								-0.367126	0.5268							-0.367126	0
0.733395	1.5963								0.733395	0.6772							0.733395	0.1037
Panel D
Pupil Area Correlation	Freezing Ratio		Stats
0.430952	0.2009			Fit linear equation	Line R2	p value
0.632776	0.2065			y = -0.0357x + 0.3674	0.00278095	0.699498
0.762849	0.3585
0.608452	0.2449
0.386351	0.1852
0.768214	0.175
0.269732	0.1753
0.451423	0.1954
0.452783	0.1875
0.782587	0.188
0.104513	0.1873
0.73996	0.5675
0.357365	0.211
0.713604	0.1918
0.489518	0.619
0.512479	0.6165
0.120276	0.2885
0.887162	0.5788
0.959307	0.2227
0.73851	0.4059
0.842154	0.6137
0.956199	0.1883
0.938109	0.2075
0.89112	0.2098
0.908739	0.2264
0.534926	0.3784
0.926245	0.2995
0.300683	0.2894
0.0652044	0.2343
0.630272	0.7376
0.580764	0.7411
0.623454	0.5082
0.418133	0.731
0.212536	0.8498
0.0387517	0.5768
0.705858	0.2614
0.508387	0.2677
0.596357	0.3267
0.288907	0.4561
0.616218	0.2717
0.548207	0.2529
0.714568	0.267
0.508352	0.2541
0.546151	0.3138
0.296387	0.2981
-0.0334266	0.193
0.163321	0.2612
0.229266	0.2218
0.168491	0.1707
0.542871	0.194
0.742745	0.1767
0.229556	0.7166
0.496769	0.8625
0.170004	0.2885
-0.367126	0.3712
0.733395	0.3361

[truncated: 8 more sheets: Supplementary Figure 9, Supplementary Figure 11, Supplementary Figure 12, Supplementary Figure 13, Supplementary Figure 15, Supplementary Figure 17, Supplementary Figure 18, Supplementary Figure 19]
